# Supplementary material for: A Global Survey of the Full-Length Transcriptome of Apis mellifera by Single-Molecule Long-Read Sequencing
Source: MDPI journal article supplement (doi:10.3390/ijms24065827), 2023-03-18
Supplement: s1 [file s1]

Table S8 Primers for verification of alternative splicing events

| Gene             | Primer sequences                                       |
|------------------|--------------------------------------------------------|
| NC_037638.1.1016 | F: CACTTCGGCAACGCTGGAT<br>R: ACTTTCTTGGATTGAAATCCTTGGC |
| NC_037640.1.1269 | F: AATACATCAAGTTATGAGG<br>R: GCATTTCATTATTGGTTGTCC     |
| NC_037640.1.1279 | F: AGCATTGGGAGCATCACATCC<br>R: TGC GGCTCCTTCCATACGAT   |
| NC_037641.1.755  | F: CGATACGCCGAGGACGAAAG<br>R: CTCGTTCCGGTCGTTGCAGTT    |
| NC_037641.1.72   | F: TGGTCCTTCGGTACAACGTG<br>R: CATGTGTATCCGCATCATTCGT   |
