# Supplementary material for: A Global Survey of the Full-Length Transcriptome of Apis mellifera by Single-Molecule Long-Read Sequencing
Source: MDPI journal article supplement (doi:10.3390/ijms24065827), 2023-03-18
Supplement: s1 [file s1]

Table S3 Summary of the annotation results of all the transcripts and new genes.

| Database    | Transcript        | New gene         |
|-------------|-------------------|------------------|
| Total       | 116,535 (100.00%) | 18,915 (100.00%) |
| NR          | 92,438 (79.32%)   | 2958 (15.64%)    |
| GO          | 59,272 (50.86%)   | 1567 (8.28%)     |
| KO          | 67,958 (58.32%)   | 1512 (7.99%)     |
| KOG         | 29,912 (25.67%)   | 216 (1.14%)      |
| Swiss-Prot  | 70,442 (60.45%)   | 1098 (5.80%)     |
| Unannotated | 24,058 (20.64%)   | 15,948 (84.31%)  |
