# Supplementary material for: A Global Survey of the Full-Length Transcriptome of Apis mellifera by Single-Molecule Long-Read Sequencing
Source: MDPI journal article supplement (doi:10.3390/ijms24065827), 2023-03-18
Supplement: s1 [file s1]

Table S7 The samples from different developmental time points and organs/tissues of *A. mellifera*.

| Sample | Developmental time points and organs/tissues                                                                                                                                                                                                           |
|--------|--------------------------------------------------------------------------------------------------------------------------------------------------------------------------------------------------------------------------------------------------------|
| Queen  | 0h egg, 24h egg, 48h egg, 72h egg, 2d larvae, 4d larvae, 5d larvae, 3d pupae, 5d pupae, 7d pupae, new emerged queen, sexually mature queen; and antenna, brain, hypopharyngeal gland, muscle, leg, middle intestine, skin, ovary of new emerged queen. |
| Worker | 0h egg, 24h egg, 48h egg, 72h egg, 2d larvae, 4d larvae, 6d larvae, 3d pupae, 6d pupae, 8d pupae, new emerged worker, nurse, forger; and antenna, brain, hypopharyngeal gland, muscle, leg, middle intestine, skin of new emerged queen                |
| Drone  | 0h egg, 24h egg, 48h egg, 72h egg, 2d larvae, 5d larvae, 3d pupae, 8d pupae, 12d pupae, new emerged drone, sexually mature drone; and antenna, brain, hypopharyngeal gland, muscle, leg, middle intestine, skin, testis of new emerged drone           |
