# Supplementary figures and images for: A Global Survey of the Full-Length Transcriptome of Apis mellifera by Single-Molecule Long-Read Sequencing
Source: MDPI journal article supplement (doi:10.3390/ijms24065827), 2023-03-18

Queen

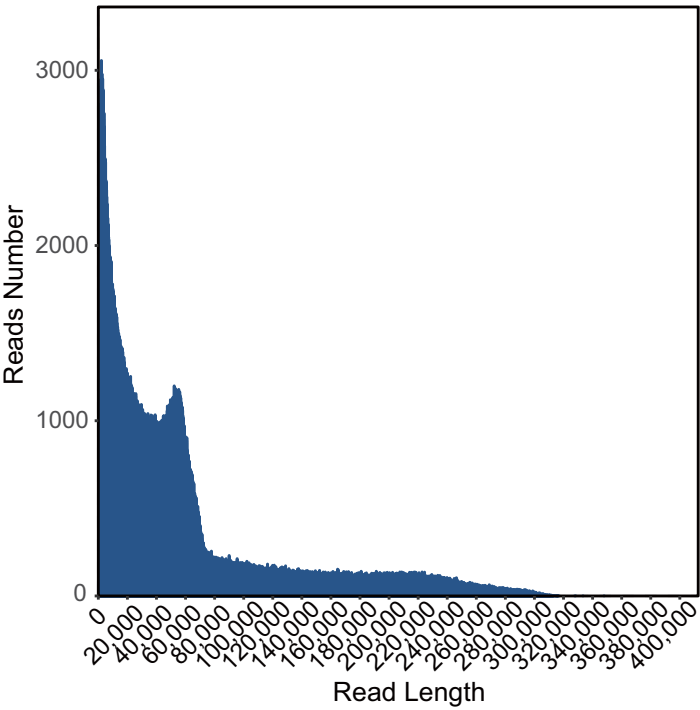

Worker

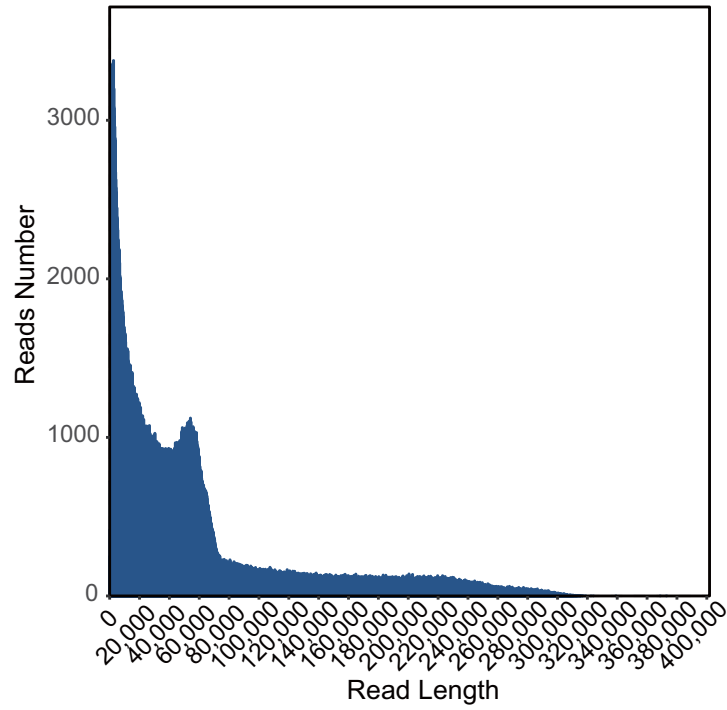

Drone

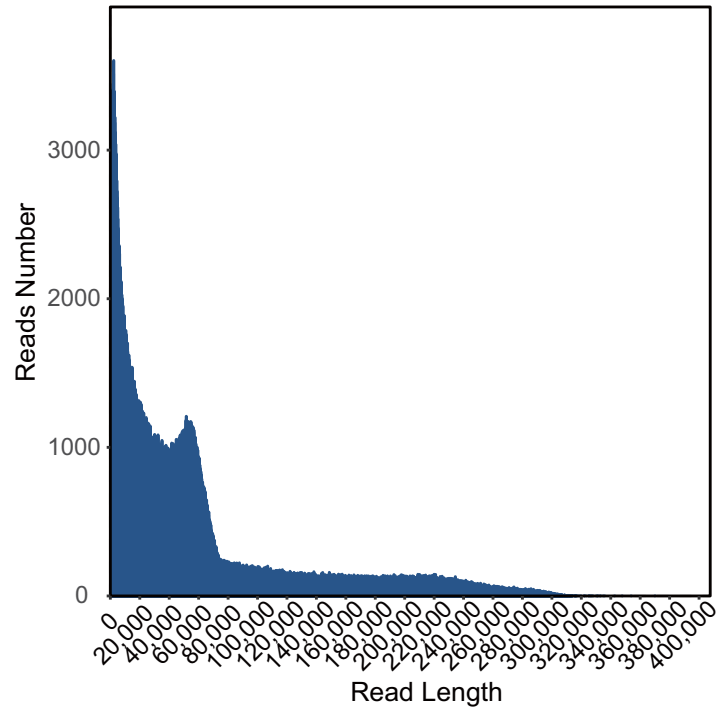

Supplement: s1 [file s1]

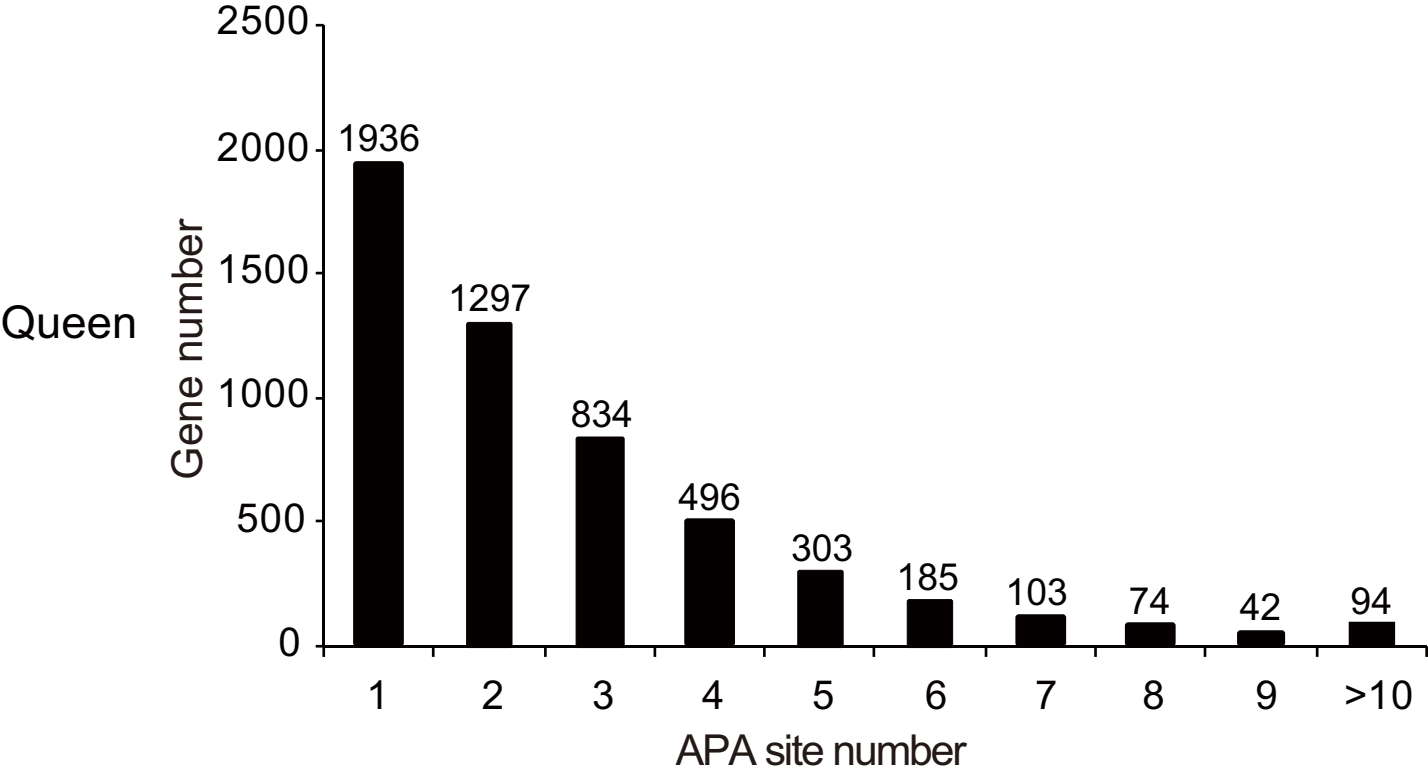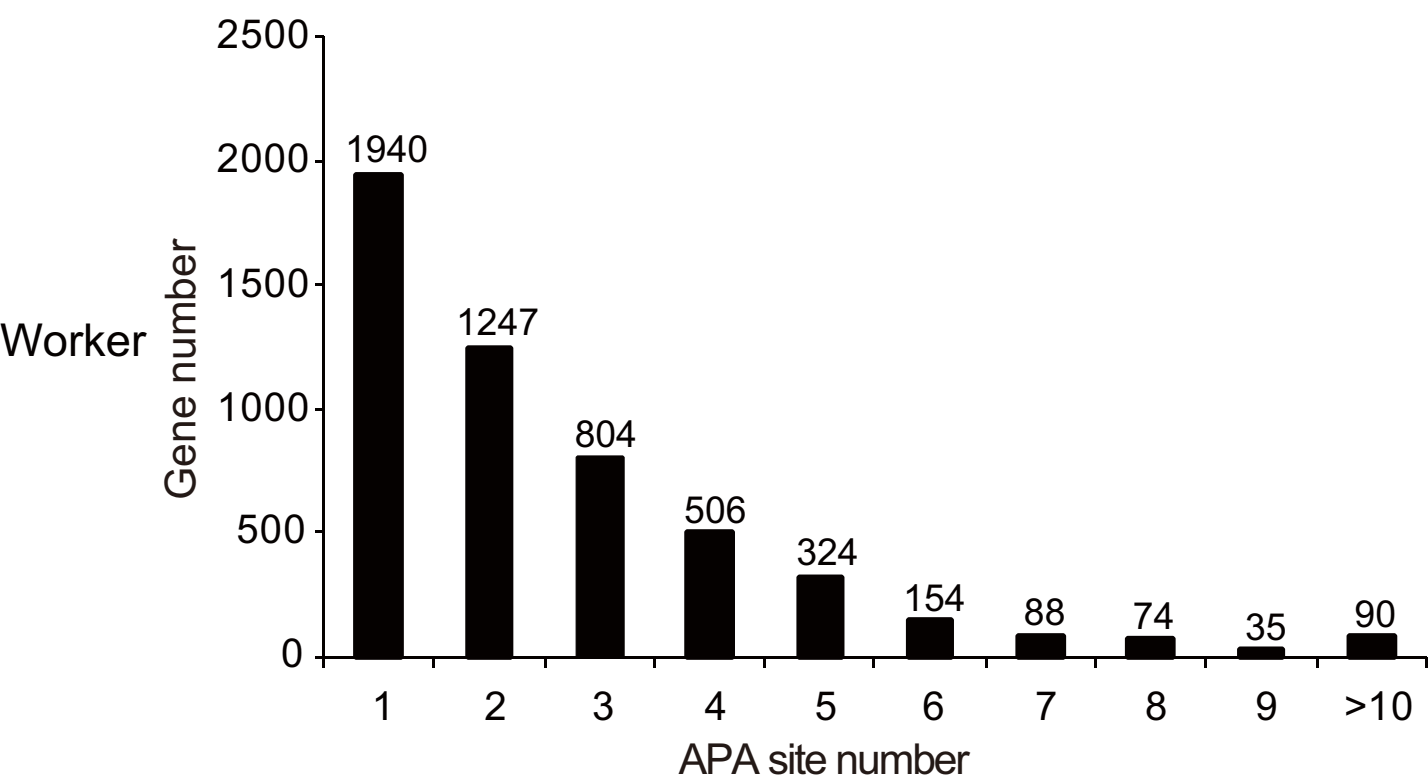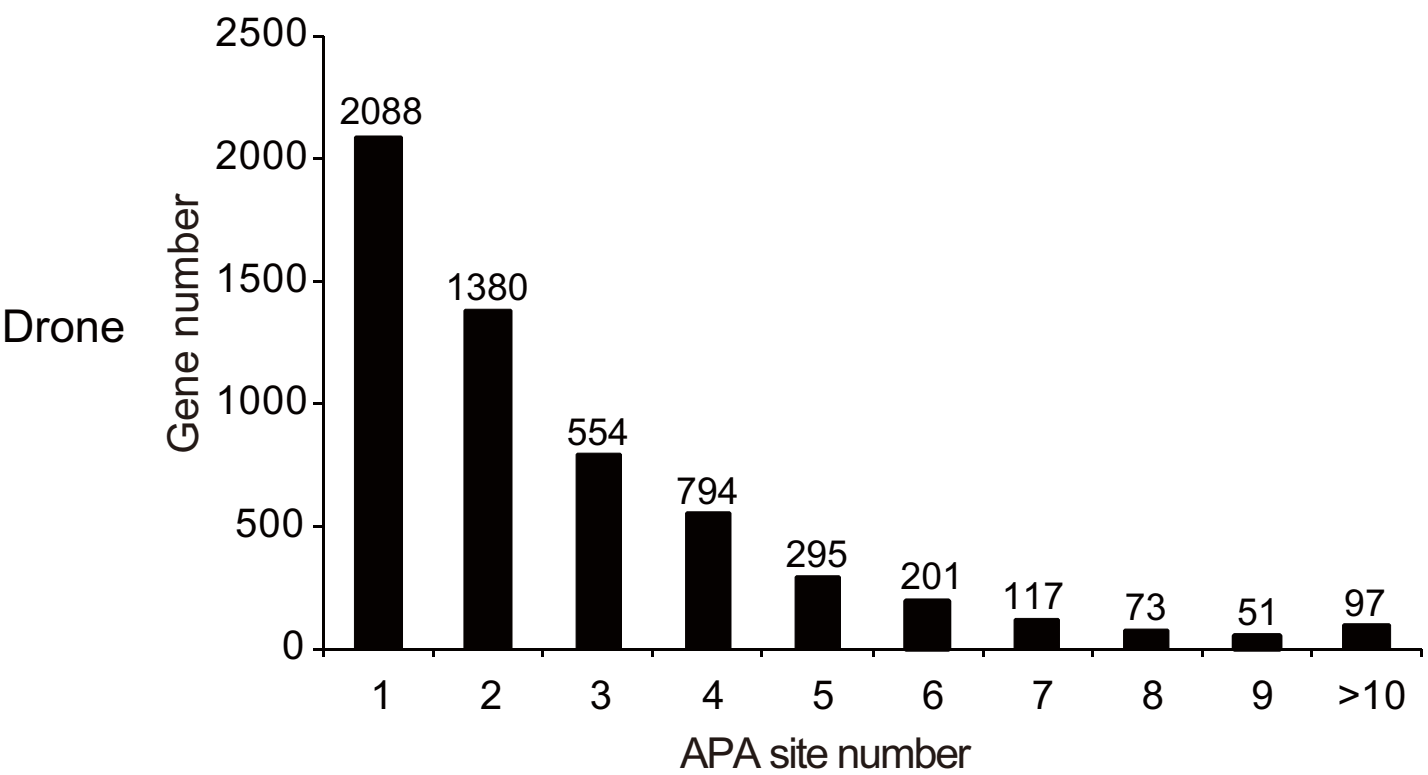

Supplement: s1 [file s1]

Queen

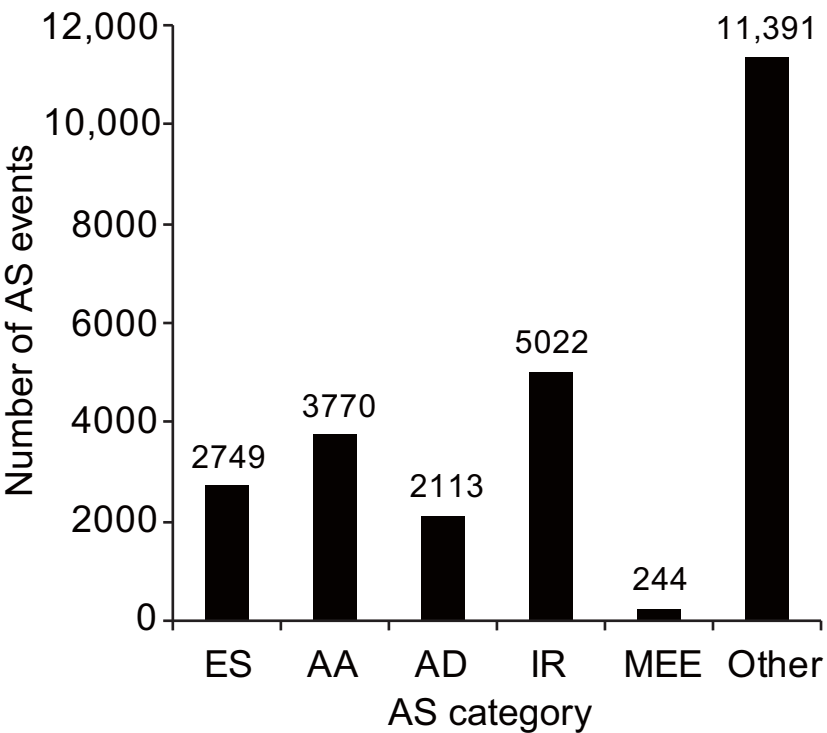

Worker

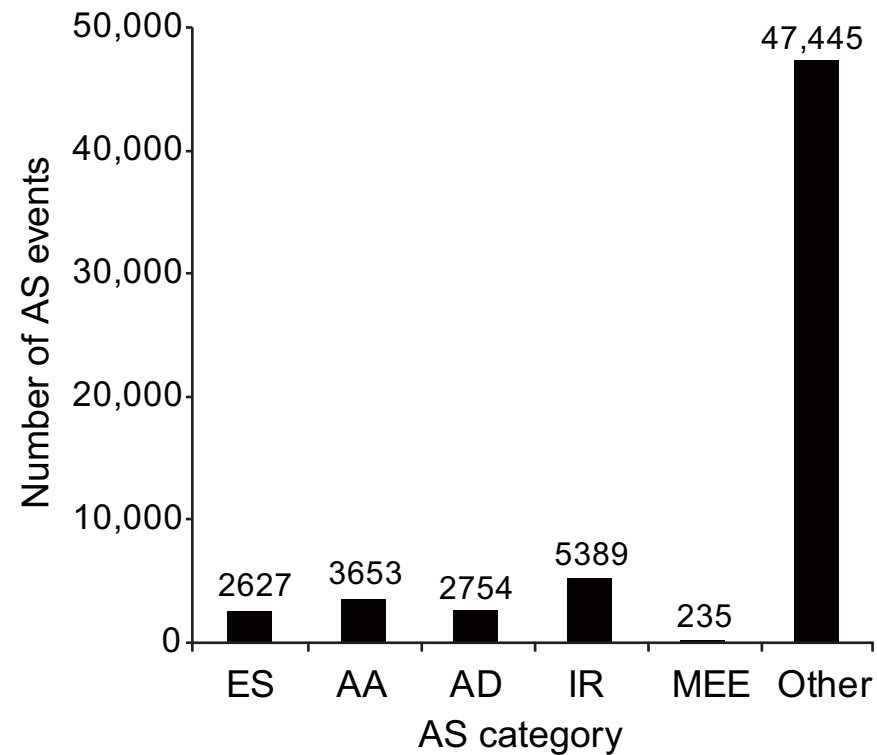

Drone

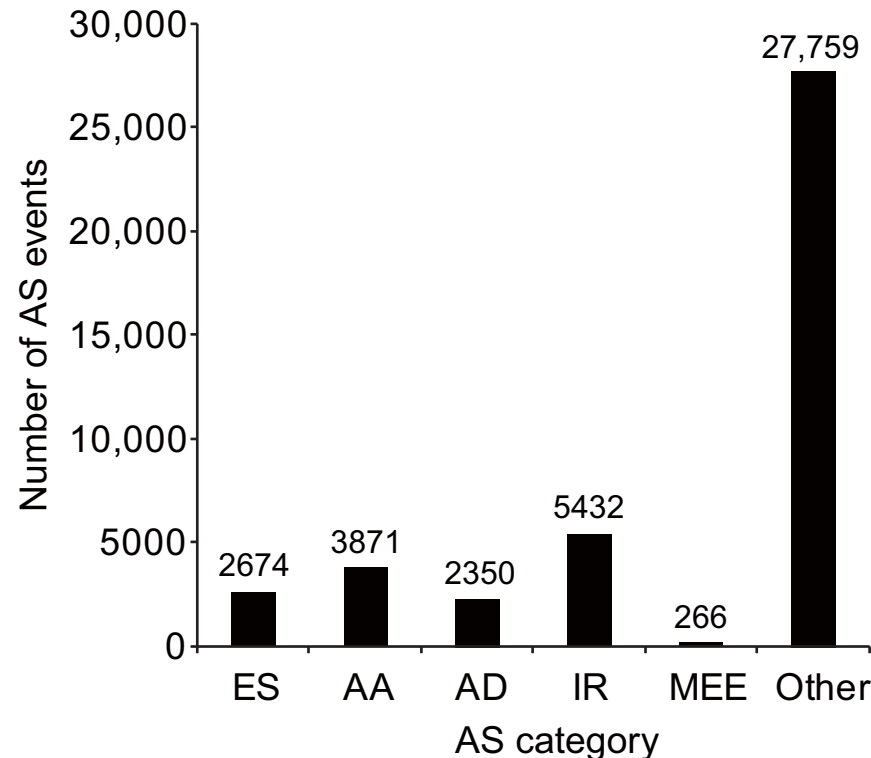

Supplement: s1 [file s1]

Queen

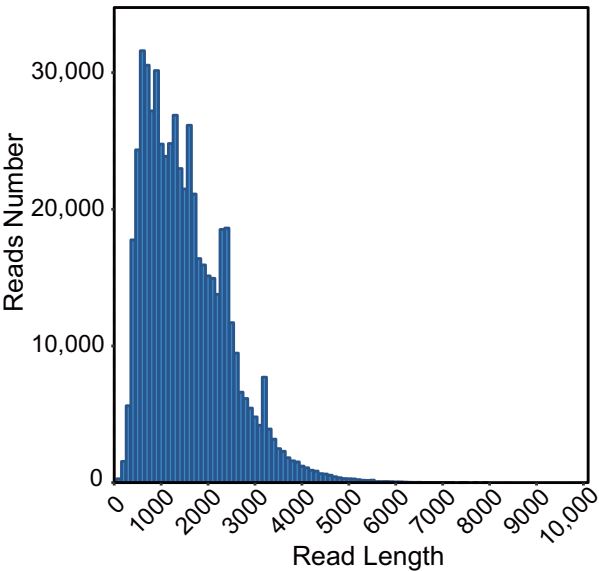

Worker

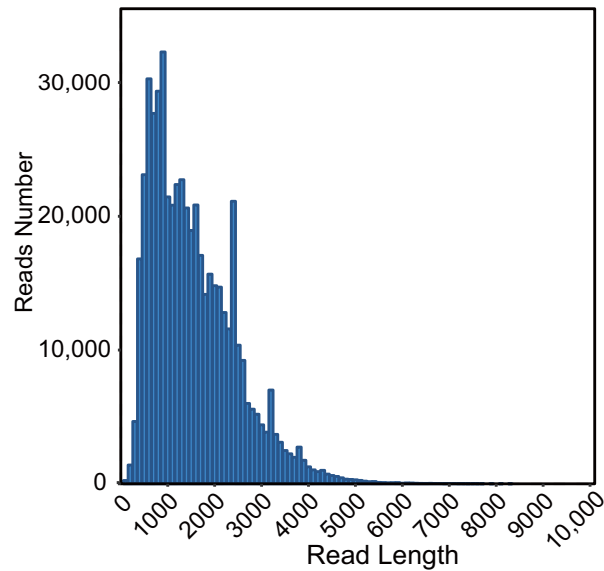

Drone

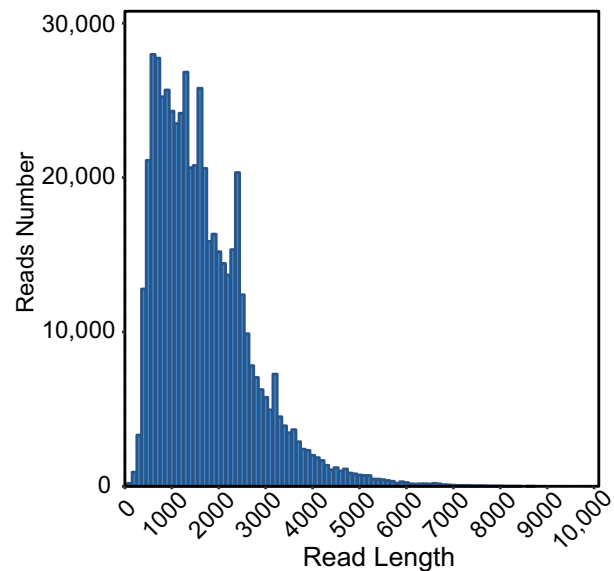

Supplement: s1 [file s1]
